# Supplementary material for: Antimicrobial Activity of Dihydroisocoumarin Isolated from Wadi Lajab Sediment-Derived Fungus Penicillium chrysogenum: In Vitro and In Silico Study
Source: MDPI journal article supplement (doi:10.3390/molecules27113630), 2022-06-06
Supplement: s1 [file s1]

## Supplementary material

**Table S1: Molecular docking parameters for the interaction of ligands with NDM-1**

| Donor atom          | Acceptor atom | Distance (Å) | Type of interaction          | Docking energy, ΔG (kcal mol <sup>-1</sup> ) | Binding affinity, K <sub>d</sub> (M <sup>-1</sup> ) |
|---------------------|---------------|--------------|------------------------------|----------------------------------------------|-----------------------------------------------------|
| Meropenem (Control) |               |              |                              |                                              |                                                     |
| Zn                  | Asp124:OD1    | 2.65268      | Electrostatic                | -7.9                                         | 6.2 × 10 <sup>5</sup>                               |
| Gln123:HN           | Lig:O         | 1.83673      | Hydrogen Bond                |                                              |                                                     |
| Asn220:HD21         | Lig:O         | 1.74830      | Hydrogen Bond                |                                              |                                                     |
| His189:CE1          | Lig:O         | 3.59611      | Hydrogen Bond                |                                              |                                                     |
| His250              | Lig:C         | 4.45873      | Hydrophobic (Pi-Alkyl)       |                                              |                                                     |
| Compound 1          |               |              |                              |                                              |                                                     |
| Gln123:HN           | Lig:O         | 2.23140      | Hydrogen Bond                | -5.7                                         | 1.5 × 10 <sup>4</sup>                               |
| Lig:H               | Asp124:OD2    | 2.67619      | Hydrogen Bond                |                                              |                                                     |
| Trp93               | Lig           | 4.84540      | Hydrophobic (Pi-Pi T-shaped) |                                              |                                                     |
| Lig                 | Val73         | 4.90669      | Hydrophobic (Alkyl)          |                                              |                                                     |
| Lig:C               | Val73         | 4.16146      | Hydrophobic (Alkyl)          |                                              |                                                     |
| Phe70               | Lig:C         | 5.23287      | Hydrophobic (Alkyl)          |                                              |                                                     |
| Trp93               | Lig           | 5.22239      | Hydrophobic (Pi-Alkyl)       |                                              |                                                     |
|                     |               |              | Hydrophobic (Pi-Alkyl)       |                                              |                                                     |
| Compound 2          |               |              |                              |                                              |                                                     |
| Lig:H               | His120:NE2    | 2.68764      | Hydrogen Bond                | -6.0                                         | 2.5 × 10 <sup>4</sup>                               |
| Lig:H               | Asp124:OD1    | 2.55858      | Hydrogen Bond                |                                              |                                                     |
| Asp124:OD2          | Lig           | 3.86467      | Electrostatic (Pi-Anion)     |                                              |                                                     |
| Lig:C               | Val73         | 4.40664      | Hydrophobic (Alkyl)          |                                              |                                                     |
| Compound 3          |               |              |                              |                                              |                                                     |
| Lig:H               | His250:NE2    | 2.40288      | Hydrogen Bond                | -6.0                                         | 2.5 × 10 <sup>4</sup>                               |
| Lig:H               | His120:NE2    | 2.81175      | Hydrogen Bond                |                                              |                                                     |
| Lig:H               | His189:NE2    | 2.30996      | Hydrogen Bond                |                                              |                                                     |
| Asp124:OD2          | Lig           | 3.79230      | Electrostatic (Pi-Anion)     |                                              |                                                     |
| Lig:H               | His250        | 2.79062      | Hydrogen Bond (Pi-Donor)     |                                              |                                                     |
| Lig:C               | Leu65         | 5.15741      | Hydrophobic (Alkyl)          |                                              |                                                     |
| Trp93               | Lig           | 4.84339      | Hydrophobic (Alkyl)          |                                              |                                                     |
| Trp93               | Lig:C         | 5.18681      | Hydrophobic (Pi-Alkyl)       |                                              |                                                     |
| Lig                 | Cys208        | 5.48747      | Hydrophobic (Pi-Alkyl)       |                                              |                                                     |
|                     |               |              | Hydrophobic (Pi-Alkyl)       |                                              |                                                     |
| Compound 4          |               |              |                              |                                              |                                                     |
| Lig:H               | His120:NE2    | 2.59981      | Hydrogen Bond                | -6.2                                         | 3.5 × 10 <sup>4</sup>                               |
| Lig:H               | Asp124:OD1    | 2.60945      | Hydrogen Bond                |                                              |                                                     |

|                   |            |         |                              |      |                   |
|-------------------|------------|---------|------------------------------|------|-------------------|
| Asp124:OD2        | Lig        | 3.78924 | Electrostatic (Pi-Anion)     |      |                   |
| Trp93             | Lig        | 4.89358 | Hydrophobic (Pi-Pi T-shaped) |      |                   |
| Lig:C             | Leu65      | 5.18009 | Hydrophobic (Alkyl)          |      |                   |
| Trp93             | Lig:C      | 5.14392 | Hydrophobic (Pi-Alkyl)       |      |                   |
| Lig               | Cys208     | 5.49731 | Hydrophobic (Pi-Alkyl)       |      |                   |
| <b>Compound 5</b> |            |         |                              |      |                   |
| Lig:H             | His250:NE2 | 2.37525 | Hydrogen Bond                | -6.2 | $3.5 \times 10^4$ |
| Lig:H             | His120:NE2 | 2.85780 | Hydrogen Bond                |      |                   |
| Lig:H             | His189:NE2 | 2.77597 | Hydrogen Bond                |      |                   |
| His189:CE1        | Lig:O      | 3.56765 | Carbon Hydrogen Bond         |      |                   |
| Asp124:OD2        | Lig        | 3.88985 | Electrostatic (Pi-Anion)     |      |                   |
| Lig:Cl N          | His250     | 3.79463 | Hydrophobic (Pi-Sigma)       |      |                   |
| Lig:C             | Val73      | 4.27020 | Hydrophobic (Alkyl)          |      |                   |
| Lig               | Val73      | 5.37177 | Hydrophobic (Pi-Alkyl)       |      |                   |

**Table S2: Molecular docking parameters for the interaction of ligands with CTX-M-15.**

| Donor atom          | Acceptor atom | Distance (Å) | Type of interaction    | Docking energy, ΔG (kcal mol <sup>-1</sup> ) | Binding affinity, K <sub>d</sub> (M <sup>-1</sup> ) |
|---------------------|---------------|--------------|------------------------|----------------------------------------------|-----------------------------------------------------|
| Avibactam (control) |               |              |                        |                                              |                                                     |
| Asn104:HD22         | Lig:O         | 2.61748      | Hydrogen Bond          | -6.8                                         | 9.7 × 10 <sup>4</sup>                               |
| Lys234:HZ1          | Lig:O         | 2.51108      | Hydrogen Bond          |                                              |                                                     |
| Lig:H               | Thr216:O      | 2.78293      | Hydrogen Bond          |                                              |                                                     |
| Compound 1          |               |              |                        |                                              |                                                     |
| Ser70:HG            | Lig:O         | 2.95585      | Hydrogen Bond          | -6.7                                         | 8.2 × 10 <sup>4</sup>                               |
| Asn132:HD22         | Lig:O         | 1.86264      | Hydrogen Bond          |                                              |                                                     |
| Asn170:HD22         | Lig:O         | 2.86371      | Hydrogen Bond          |                                              |                                                     |
| Compound 2          |               |              |                        |                                              |                                                     |
| Ser70:HG            | Lig:O         | 2.85091      | Hydrogen Bond          | -6.5                                         | 5.8 × 10 <sup>4</sup>                               |
| Ser130:HG           | Lig:O         | 2.38463      | Hydrogen Bond          |                                              |                                                     |
| Asn132:HD22         | Lig:O         | 1.86294      | Hydrogen Bond          |                                              |                                                     |
| Lig:H               | Asn132:OD1    | 2.13260      | Hydrogen Bond          |                                              |                                                     |
| Lig:H               | Glu166:OE2    | 3.06227      | Hydrogen Bond          |                                              |                                                     |
| Tyr105              | Lig           | 4.10881      | Hydrophobic (Pi-Alkyl) |                                              |                                                     |
| Tyr105              | Lig:C         | 4.28344      | Hydrophobic (Pi-Alkyl) |                                              |                                                     |
| Compound 3          |               |              |                        |                                              |                                                     |
| Ser70:HG            | Lig:O         | 2.91922      | Hydrogen Bond          | -6.5                                         | 5.8 × 10 <sup>4</sup>                               |
|                     | Lig:O         | 1.89778      | Hydrogen Bond          |                                              |                                                     |

|                   |            |         |               |      |                   |
|-------------------|------------|---------|---------------|------|-------------------|
| Asn132:HD22       | Lig:O      | 2.85566 | Hydrogen Bond |      |                   |
| Asn170:HD22       | Ser130:O   | 2.39515 | Hydrogen Bond |      |                   |
| Lig:H             | Asn132:OD1 | 2.63829 | Hydrogen Bond |      |                   |
| Lig:H             |            |         |               |      |                   |
| <i>Compound 4</i> |            |         |               |      |                   |
| Lys73:HZ3         | Lig:O      | 2.95838 | Hydrogen Bond |      |                   |
| Ser130:HG         | Lig:O      | 2.25025 | Hydrogen Bond |      |                   |
| Asn132:HD22       | Lig:O      | 1.89371 | Hydrogen Bond | -6.8 | $9.7 \times 10^4$ |
| Asn170:HD22       | Lig:O      | 2.85984 | Hydrogen Bond |      |                   |
| Lig:H             | Asn132:OD1 | 2.31038 | Hydrogen Bond |      |                   |
| <i>Compound 5</i> |            |         |               |      |                   |
| Ser130:HG         | Lig:O      | 2.26789 | Hydrogen Bond |      |                   |
| Asn132:HD22       | Lig:O      | 1.82750 | Hydrogen Bond |      |                   |
| Asn170:HD22       | Lig:O      | 2.85047 | Hydrogen Bond | -6.7 | $8.2 \times 10^4$ |
| Lig:H             | Ser130:O   | 2.33443 | Hydrogen Bond |      |                   |
| Lig:H             | Asn132:OD1 | 2.65272 | Hydrogen Bond |      |                   |

**Table S3: Molecular docking parameters for the interaction of ligands with OXA-48**

| Donor atom         | Acceptor atom | Distance (Å) | Type of interaction          | Docking energy, ΔG (kcal mol <sup>-1</sup> ) | Binding affinity, K <sub>d</sub> (M <sup>-1</sup> ) |
|--------------------|---------------|--------------|------------------------------|----------------------------------------------|-----------------------------------------------------|
| Imipenem (control) |               |              |                              |                                              |                                                     |
| Arg250:HH22        | Lig:O         | 1.774        | Hydrogen Bond                | -6.1                                         | 2.9 × 10 <sup>4</sup>                               |
| Lig:H              | Ser70:OG      | 1.827        | Hydrogen Bond                |                                              |                                                     |
| Lig:H              | Thr209:OG1    | 2.263        | Hydrogen Bond                |                                              |                                                     |
| Lig:HN             | Lys116:O      | 2.315        | Hydrogen Bond                |                                              |                                                     |
| Lig:H              | Thr209:OG1    | 2.377        | Hydrogen Bond                |                                              |                                                     |
| Lig:H              | Tyr211:O      | 2.325        | Hydrogen Bond                |                                              |                                                     |
| Compound 1         |               |              |                              |                                              |                                                     |
| Tyr211:HN          | Lig:O         | 2.447        | Hydrogen Bond                | -6.3                                         | 4.1 × 10 <sup>4</sup>                               |
| Val120:CG2         | Lig           | 3.779        | Hydrophobic (Pi-Sigma)       |                                              |                                                     |
| Lig:C              | Ile102        | 5.133        | Hydrophobic (Alkyl)          |                                              |                                                     |
| Tyr211             | Lig:C         | 5.279        | Hydrophobic (Pi-Alkyl)       |                                              |                                                     |
| Compound 2         |               |              |                              |                                              |                                                     |
| Trp105:HE1         | Lig:O         | 2.316        | Hydrogen Bond                | -6.3                                         | 4.1 × 10 <sup>4</sup>                               |
| Arg250:HH12        | Lig:O         | 2.999        | Hydrogen Bond                |                                              |                                                     |
| Arg250:HH22        | Lig:O         | 1.750        | Hydrogen Bond                |                                              |                                                     |
| Compound 3         |               |              |                              |                                              |                                                     |
| Tyr211:HN          | Lig:O         | 2.513        | Hydrogen Bond                | -6.2                                         | 3.5 × 10 <sup>4</sup>                               |
| Lig:H              | Tyr211:O      | 2.955        | Hydrogen Bond                |                                              |                                                     |
| Val120:CG2         | Lig           | 3.845        | Hydrophobic (Pi-Sigma)       |                                              |                                                     |
| Lig:C              | Ile102        | 5.058        | Hydrophobic (Alkyl)          |                                              |                                                     |
| Tyr211             | Lig:C         | 5.272        | Hydrophobic (Pi-Alkyl)       |                                              |                                                     |
| Lig                | Leu158        | 5.443        | Hydrophobic (Pi-Alkyl)       |                                              |                                                     |
| Compound 4         |               |              |                              |                                              |                                                     |
| Tyr211:HN          | Lig:O         | 2.909        | Hydrogen Bond                | -6.4                                         | 4.9 × 10 <sup>4</sup>                               |
| Arg250:HH12        | Lig:O         | 1.885        | Hydrogen Bond                |                                              |                                                     |
| Lig:H              | Thr209:OG1    | 2.300        | Hydrogen Bond                |                                              |                                                     |
| Tyr211             | Lig           | 5.802        | Hydrophobic (Pi-Pi T-shaped) |                                              |                                                     |
| Tyr211             | Lig           | 5.532        | Hydrophobic (Pi-Pi T-shaped) |                                              |                                                     |
| Tyr211             | Lig:Cl        | 5.205        | Hydrophobic (Pi-Pi T-shaped) |                                              |                                                     |
| Lig                | Leu247        | 5.026        | Hydrophobic (Pi-Alkyl)       |                                              |                                                     |
|                    |               |              | Hydrophobic (Pi-Alkyl)       |                                              |                                                     |
| Compound 5         |               |              |                              |                                              |                                                     |

|           |        |       |                              |      |                   |
|-----------|--------|-------|------------------------------|------|-------------------|
| Tyr211:HN | Lig:O  | 2.614 | Hydrogen Bond                | -6.2 | $3.5 \times 10^4$ |
| Arg214:HE | Lig:O  | 2.339 | Hydrogen Bond                |      |                   |
| Tyr211    | Lig    | 5.366 | Hydrophobic (Pi-Pi T-shaped) |      |                   |
| Lig:C     | Ile102 | 5.150 |                              |      |                   |
| Lig:Cl    | Ile102 | 5.063 | Hydrophobic (Alkyl)          |      |                   |
| Tyr211    | Lig:C  | 5.077 | Hydrophobic (Alkyl)          |      |                   |
| Lig       | Val120 | 4.999 | Hydrophobic (Pi-Alkyl)       |      |                   |
| Lig       | Leu158 | 5.247 | Hydrophobic (Pi-Alkyl)       |      |                   |
|           |        |       | Hydrophobic (Pi-Alkyl)       |      |                   |
